# Supplementary material for: A Sustainable and Global Health Perspective of the Dietary Pattern of French Population during the 1998–2015 Period from INCA Surveys
Source: MDPI journal article supplement (doi:10.3390/su13137433), 2021-07-02
Supplement: s1 [file s1]

## Supplemental Materials

Median calorie content and percentages (total, plant and/or animal) of INCA1-3 food categories based on the French Ciquial food database (accessed on the 12<sup>th</sup> of March 2021).

**Supplemental Table S1. INCA1 (1998-1999)**

| INCA food groups                | Number of foods (Ciquial database) | kcal/100 g (median) | Number of food recipes | % animal calories | % plant calories |
|---------------------------------|------------------------------------|---------------------|------------------------|-------------------|------------------|
| Breads and rusks                | 38                                 | 285                 |                        | 0                 | 100              |
| Breakfast cereals               | 54                                 | 388                 |                        | 0                 | 100              |
| Pasta                           | 10                                 | 149                 |                        | 0                 | 100              |
| Rice and semolina               | 10                                 | 142                 |                        | 0                 | 100              |
| Viennoiseries                   | 23                                 | 369                 | 3                      | 49                | 51               |
| Sweet biscuits                  | 7                                  | 471                 | 3                      | 25                | 75               |
| Pastries                        | 9                                  | 269                 | 3                      | 47                | 53               |
| Milks                           | 15                                 | 47                  |                        | 100               | 0                |
| Ultra fresh dairy               | 46                                 | 89                  | 3                      | 72                | 28               |
| Cheeses                         | 119                                | 327                 |                        | 100               | 0                |
| Eggs and derivatives            | 8                                  | 144                 |                        | 100               | 0                |
| Butters                         | 10                                 | 730                 |                        | 100               | 0                |
| Meats                           | 75                                 | 182                 |                        | 100               | 0                |
| Poultry and game                | 27                                 | 189                 |                        | 100               | 0                |
| Delicatessen                    | 157                                | 275                 |                        | 100               | 0                |
| Fishes                          | 63                                 | 125                 |                        | 100               | 0                |
| Vegetables (except potatoes)    | 129                                | 30                  |                        | 0                 | 100              |
| Potatoes and their derivatives  | 35                                 | 125                 |                        | 0                 | 100              |
| Legumes                         | 7                                  | 116                 |                        | 0                 | 100              |
| Fruits                          | 44                                 | 54                  |                        | 0                 | 100              |
| Sugars and derivatives          | 6                                  | 358                 |                        | 0                 | 100              |
| Waters                          | 0                                  | 0                   |                        | 0                 | 0                |
| Fruit juices and sodas          | 34                                 | 46                  |                        | 0                 | 100              |
| Alcoholic beverages             | 22                                 | 182                 |                        | 0                 | 100              |
| Coffee                          | 8                                  | 7                   |                        | 0                 | 100              |
| Tea and hot drinks              | 8                                  | 3                   |                        | 0                 | 100              |
| Pizzas, quiches and savory pies | 32                                 | 241                 | 3                      | 60                | 40               |
| Sandwiches                      | 29                                 | 255                 | 3                      | 61                | 39               |
| Soups                           | 46                                 | 34                  | 3                      | 30                | 70               |
| Mixed dishes                    | 145                                | 141                 | 6                      | 62                | 38               |
| Entremets                       | 62                                 | 141                 | 3                      | 52                | 48               |
| Compotes and cooked fruits      | 9                                  | 66                  |                        | 0                 | 100              |

**Supplemental Table S2. INCA2 (2006-2007)**

| <b>INCA food groups</b>             | <b>Number of food recipes</b> | <b>% animal calories</b> | <b>% plant calories</b> |
|-------------------------------------|-------------------------------|--------------------------|-------------------------|
| Breads and rusks                    |                               | 0                        | 100                     |
| Breakfast cereals                   |                               | 0                        | 100                     |
| Pasta                               |                               | 0                        | 100                     |
| Rice and durum or cracked wheat     |                               | 0                        | 100                     |
| Other cereals                       |                               | 0                        | 100                     |
| Viennoiseries                       | 3                             | 49                       | 51                      |
| Sweet or savory biscuits and bars   | 5                             | 32                       | 68                      |
| Pastries and cakes                  | 5                             | 42                       | 58                      |
| Milks                               |                               | 100                      | 0                       |
| Ultra fresh dairy                   |                               | 100                      | 0                       |
| Cheeses                             |                               | 100                      | 0                       |
| Eggs and derivates                  |                               | 100                      | 0                       |
| Butters                             |                               | 100                      | 0                       |
| Oils                                |                               | 0                        | 100                     |
| Margarines                          |                               | 0                        | 100                     |
| Other fats                          |                               | 100                      | 0                       |
| Meats                               |                               | 100                      | 0                       |
| Poultry and game                    |                               | 100                      | 0                       |
| Offal                               |                               | 100                      | 0                       |
| Delicatessen                        |                               | 100                      | 0                       |
| Fishes                              |                               | 100                      | 0                       |
| Crustaceans and molluscs            |                               | 100                      | 0                       |
| Vegetables (except potatoes)        |                               | 0                        | 100                     |
| Potatoes and their derivatives      |                               | 0                        | 100                     |
| Legumes                             |                               | 0                        | 100                     |
| Fruits                              |                               | 0                        | 100                     |
| Nuts and seeds                      |                               | 0                        | 100                     |
| Ice creams and frozen desserts      | 3                             | 76                       | 24                      |
| Chocolate                           | 3                             | 18                       | 82                      |
| Sugars and derivatives              |                               | 0                        | 100                     |
| Waters                              |                               | 0                        | 0                       |
| Soft/fresh drinks without alcohol   |                               | 0                        | 100                     |
| Alcoholic beverages                 |                               | 0                        | 100                     |
| Coffee                              |                               | 0                        | 100                     |
| Other hot beverages                 |                               | 0                        | 100                     |
| Pizzas, quiches and savory pastries | 3                             | 60                       | 40                      |
| Sandwiches, snacks                  | 3                             | 61                       | 39                      |

|                                                             |    |    |     |
|-------------------------------------------------------------|----|----|-----|
| Soups and broths                                            | 3  | 30 | 70  |
| Mixed dishes                                                | 6  | 62 | 38  |
| Entremets, dessert creams and gelled milks                  | 4  | 52 | 48  |
| Compotes and cooked fruits                                  |    | 0  | 100 |
| Condiments and sauces                                       | 4  | 1  | 99  |
| Foods intended for a specific food (including infant foods) | 13 | 61 | 39  |

**Supplemental Table S3. INCA3 (2014-2015)**

| <b>INCA food groups</b>                               | <b>Number of food recipes</b> | <b>% animal calories</b> | <b>% plant calories</b> |
|-------------------------------------------------------|-------------------------------|--------------------------|-------------------------|
| Refined bread and dry breadmaking                     |                               | 0                        | 100                     |
| Wholegrain bread and dry breadmaking                  |                               | 0                        | 100                     |
| Breakfast cereals and cereal bars                     |                               | 0                        | 100                     |
| Refined pasta, rice, wheat and other cereals          |                               | 0                        | 100                     |
| Wholegrain pasta, rice, wheat and other cereals       |                               | 0                        | 100                     |
| Viennese pastries, pastries, cakes and sweet biscuits | 9                             | 41                       | 60                      |
| Milks                                                 |                               | 100                      | 0                       |
| Ultra fresh dairy                                     |                               | 100                      | 0                       |
| Cheeses                                               |                               | 100                      | 0                       |
| Entremets and dessert creams                          | 3                             | 52                       | 48                      |
| Ice creams, frozen desserts and sorbets               | 4                             | 76                       | 24                      |
| Animal fat                                            |                               | 100                      | 0                       |
| Plant fats                                            |                               | 0                        | 100                     |
| Eggs and derivates                                    |                               | 100                      | 0                       |
| Meats                                                 |                               | 100                      | 0                       |
| Poultry                                               |                               | 100                      | 0                       |
| Delicatessen                                          |                               | 100                      | 0                       |
| Fishes                                                |                               | 100                      | 0                       |
| Crustaceans and molluscs                              |                               | 100                      | 0                       |
| Offal                                                 |                               | 100                      | 0                       |
| Vegetables (except potatoes)                          |                               | 0                        | 100                     |
| Legumes                                               |                               | 0                        | 100                     |
| Potatoes and other tubers                             |                               | 0                        | 100                     |
| Fresh and dried fruits                                |                               | 0                        | 100                     |
| Compotes and fruits in syrup                          |                               | 0                        | 100                     |
| Nuts and seeds                                        |                               | 0                        | 100                     |
| Confectionery and chocolate                           | 4                             | 20                       | 80                      |
| Sugars and derivatives                                |                               | 0                        | 100                     |
| Tap water                                             |                               | 0                        | 0                       |

|                                                                     |    |    |     |
|---------------------------------------------------------------------|----|----|-----|
| Packaged water                                                      |    | 0  | 0   |
| Soft drinks without alcohol                                         |    | 0  | 100 |
| Fruit juices and sodas                                              |    | 0  | 100 |
| Alcoholic beverages                                                 |    | 0  | 100 |
| Hot beverages                                                       |    | 0  | 100 |
| Soups and broths                                                    | 3  | 30 | 70  |
| Meat dishes                                                         | 3  | 38 | 62  |
| Fish dishes                                                         | 3  | 38 | 62  |
| Vegetable-based dishes                                              |    | 0  | 100 |
| Dishes made with potatoes, cereals or legumes                       |    | 0  | 100 |
| Sandwiches, pizzas, pies, pastries and crackers                     | 7  | 63 | 37  |
| Condiments, herbs, spices and sauces                                | 4  | 1  | 99  |
| Substitutes for animal products made from soybeans and other plants |    | 0  | 100 |
| Prepared meals and infant desserts                                  | 13 | 61 | 39  |
| Infant milks and beverages                                          | 2  | 54 | 46  |

NB: the percentage of plant and animal calories of mixed/combined INCA food categories are based on most consumed French food dishes (accessed on internet on the 12th of March 2021: <https://www.marmiton.org/>)
